# Supplementary material
Source: publisher figshare collection journal article supplement (https://sage.figshare.com/ndownloader/files/24172201)
Supplement: Supplementary file 1 [file 24172201]

**Appendix 1:**

Date of Surgery:

Pre-operative narcotic use for hip pain:

Pre-operative chronic pain diagnosis:

Age:

Height:

Weight:

Procedure performed:

BMI:

Numeric Rating Pain Scale (0-10)

Pre-operative:

Post-operative t=0 minutes:

Post-operative t=30 minutes:

Post-operative t=60 minutes:

Post-operative t=90 minutes:

Post-operative t=120 minutes:

Morphine equivalents in PACU within first (hour or 2??): \_\_\_\_\_

Time to discharge from PACU (min): \_\_\_\_\_

Presence of nausea in PACU: Y / N

Presence of emesis in PACU: Y / N

Presence of respiratory depression in PACU: Y / N

Patient satisfaction with pain control at time of discharge: Y / N

Presence of falls in PACU: Y / N

Presence of transfer to hospital from PACU: Y / N

POD3:

Presence of falls at home: Y / N

Need for hospital admission: Y / N

Complaints of constipation within last 3 days: Y / N

Patient satisfaction with pain control at POD2: Y / N

Number of Percocet taken each day:

DOS:

POD1:

POD2:

Presence of minor neuropathy at first follow-up visit:

Presence of block serious complications: long term neuropathy
